# Supplementary material
Source: HighWire-hosted journal article supplement (http://www.cmaj.ca/highwire/filestream/59191/field_highwire_adjunct_files/5/screen-wong-5-at.pdf)
Supplement: screen-wong-5-at.pdf [file screen-wong-5-at.pdf]

| <b>Appendix 5 (as submitted by the authors): Cost-effectiveness results for treatment pattern changed for IFN-Free DAAs</b>                                                                                                                                                                                                                                                                                          |                                                                        |                                                          |                     |                     |                      |                    |                               |
|----------------------------------------------------------------------------------------------------------------------------------------------------------------------------------------------------------------------------------------------------------------------------------------------------------------------------------------------------------------------------------------------------------------------|------------------------------------------------------------------------|----------------------------------------------------------|---------------------|---------------------|----------------------|--------------------|-------------------------------|
|                                                                                                                                                                                                                                                                                                                                                                                                                      |                                                                        | <b><u>Compared to Common baseline (No Screening)</u></b> |                     |                     |                      |                    |                               |
| <b><u>Age range</u></b>                                                                                                                                                                                                                                                                                                                                                                                              | <b><u>Strategy</u></b>                                                 | <b><u>Cost</u></b>                                       | <b><u>QALYs</u></b> | <b><u>ΔCost</u></b> | <b><u>ΔQALYs</u></b> | <b><u>ICER</u></b> | <b><u>Sequential ICER</u></b> |
| 25-64                                                                                                                                                                                                                                                                                                                                                                                                                | No screening                                                           | \$71,330                                                 | 13.7662             | -                   | -                    | -                  | -                             |
|                                                                                                                                                                                                                                                                                                                                                                                                                      | Screen & treat with PR                                                 | \$71,460                                                 | 13.7710             | \$130               | 0.0048               | \$27,077           | \$27,077*                     |
|                                                                                                                                                                                                                                                                                                                                                                                                                      | Screen & treat with<br>G1: IFN-Free DAA<br>G2/3: SOF/RBV<br>G4/5/6: PR | \$71,665                                                 | 13.7780             | \$335               | 0.0118               | \$28,459           | \$28,459                      |
|                                                                                                                                                                                                                                                                                                                                                                                                                      | Screen & treat with<br>G1:simeprevir+PR<br>G2/3: SOF/RBV<br>G4/5/6: PR | \$71,666                                                 | 13.7758             | \$336               | 0.0096               | \$34,840           | Dominated                     |
| 45-64                                                                                                                                                                                                                                                                                                                                                                                                                | No screening                                                           | \$83,335                                                 | 12.1027             | -                   | -                    | -                  | -                             |
|                                                                                                                                                                                                                                                                                                                                                                                                                      | Screen & treat with PR                                                 | \$83,342                                                 | 12.1037             | \$152               | 0.0059               | \$25,715           | \$25,715                      |
|                                                                                                                                                                                                                                                                                                                                                                                                                      | Screen & treat with<br>G1:simeprevir+PR<br>G2/3: SOF/RBV<br>G4/5/6: PR | \$83,494                                                 | 12.1097             | \$432               | 0.0114               | \$37,882           | \$50,953*                     |
|                                                                                                                                                                                                                                                                                                                                                                                                                      | Screen & treat with<br>G1: IFN-Free DAA<br>G2/3: SOF/RBV<br>G4/5/6: PR | \$83,775                                                 | 12.1152             | \$434               | 0.0142               | \$30,462           | \$33,831                      |
| G1: genotype 1; G2/3: genotype 2 or 3; G4/5/6: genotype 4 or 5 or 6; PR = pegylated interferon plus ribavirin; QALY = quality-adjusted life-year; SIM = simeprevir;<br>SOF/RBV = sofosbuvir plus ribavirin; IFN-Free DAA = interferon-free direct-acting antiviral agents; ICER = incremental cost-effectiveness ratio<br>*Extendedly dominated = the combination of two other alternatives dominated the treatment. |                                                                        |                                                          |                     |                     |                      |                    |                               |
